# Supplementary material for: A one-step solvothermal synthesis of the topological insulator Bi2Te3 nanorod-modified TiO2 photocatalyst for enhanced H2-evolution activity
Source: Royal Society of Chemistry journal article supplement (doi:10.1039/d2tc00594h), 2022-01-01
Supplement: d2tc00594h1.pdf [file d2tc00594h1.pdf]

## Supporting Information

### **One-step solvothermal synthesis of topological insulator Bi<sub>2</sub>Te<sub>3</sub> nanorod-modified TiO<sub>2</sub> photocatalyst for enhanced H<sub>2</sub>-evolution activity**

Lin Dong,<sup>a</sup> Xuefei Wang,<sup>a</sup> Ping Wang,<sup>\*a</sup> and Huogen Yu<sup>\*ab</sup>

<sup>a</sup> School of Chemistry, Chemical Engineering and Life Sciences, Wuhan University of  
Technology, Wuhan 430070, PR China

<sup>b</sup> Laboratory of Solar Fuel, Faculty of Materials Science and Chemistry, China  
University of Geosciences, Wuhan, 430074, PR China

\*Corresponding authors. Tel: +86(27)87749379;

E-mail: wangping0904@whut.edu.cn (Ping Wang);

huogenyu@163.com (Huogen Yu)

## Figure captions

**Fig. S1.** The photocatalytic H<sub>2</sub>-evolution activity of Bi<sub>2</sub>Te<sub>3</sub>/TiO<sub>2</sub>(0.5 wt%) in lactic acid (CA, 10 vol%), triethanolamine (TEOA, 10 vol%), and ethyl alcohol (EA, 25 vol%) of (a) TiO<sub>2</sub> and (b) Bi<sub>2</sub>Te<sub>3</sub>/TiO<sub>2</sub>(0.5 wt%).

**Fig. S2.** (A) The XRD patterns and (B) UV-vis spectra of (a) TiO<sub>2</sub>, (b) Bi<sub>2</sub>Te<sub>3</sub>/TiO<sub>2</sub>(5.0 wt%) before photocatalytic H<sub>2</sub> evolution, and (c) Bi<sub>2</sub>Te<sub>3</sub>/TiO<sub>2</sub>(5.0 wt%) after photocatalytic H<sub>2</sub> evolution.

**Table S1.** The ICP-OES results of Bi<sub>2</sub>Te<sub>3</sub>/TiO<sub>2</sub> samples.

| Samples                                                     | Bi (wt%) | Te (wt%) | Molar ratio of<br>Te/Bi | Actual ratio of<br>Bi <sub>2</sub> Te <sub>3</sub> /TiO <sub>2</sub><br>(wt%) |
|-------------------------------------------------------------|----------|----------|-------------------------|-------------------------------------------------------------------------------|
| Bi <sub>2</sub> Te <sub>3</sub> /TiO <sub>2</sub> (0.5 wt%) | 0.2404   | 0.2165   | 1.47                    | 0.45                                                                          |
| Bi <sub>2</sub> Te <sub>3</sub> /TiO <sub>2</sub> (5.0 wt%) | 2.9553   | 2.5986   | 1.44                    | 5.43                                                                          |

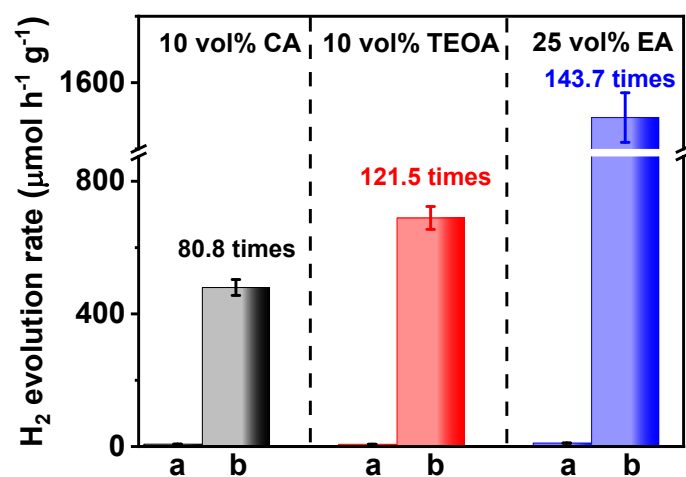

**Fig. S1.** The photocatalytic H<sub>2</sub>-evolution activity of Bi<sub>2</sub>Te<sub>3</sub>/TiO<sub>2</sub>(0.5 wt%) in lactic acid (CA, 10 vol%), triethanolamine (TEOA, 10 vol%), and ethyl alcohol (EA, 25 vol%) of (a) TiO<sub>2</sub> and (b) Bi<sub>2</sub>Te<sub>3</sub>/TiO<sub>2</sub>(0.5 wt%).

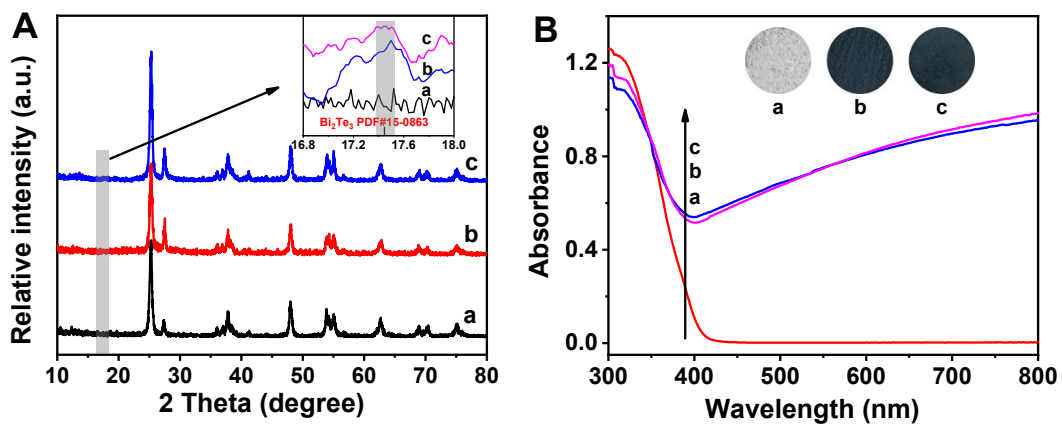

**Fig. S2.** (A) The XRD patterns and (B) UV-vis spectra of (a) TiO<sub>2</sub>, (b) Bi<sub>2</sub>Te<sub>3</sub>/TiO<sub>2</sub>(5.0 wt%) before photocatalytic H<sub>2</sub> evolution, and (c) Bi<sub>2</sub>Te<sub>3</sub>/TiO<sub>2</sub>(5.0 wt%) after photocatalytic H<sub>2</sub> evolution.
